# Supplementary material for: Scoring of swine lung images: a comparison between a computer vision system and human evaluators
Source: Springer Nature journal article supplement (doi:10.1186/s13567-024-01432-5), 2025-01-13

Multiclass accuracy in left apical lobe

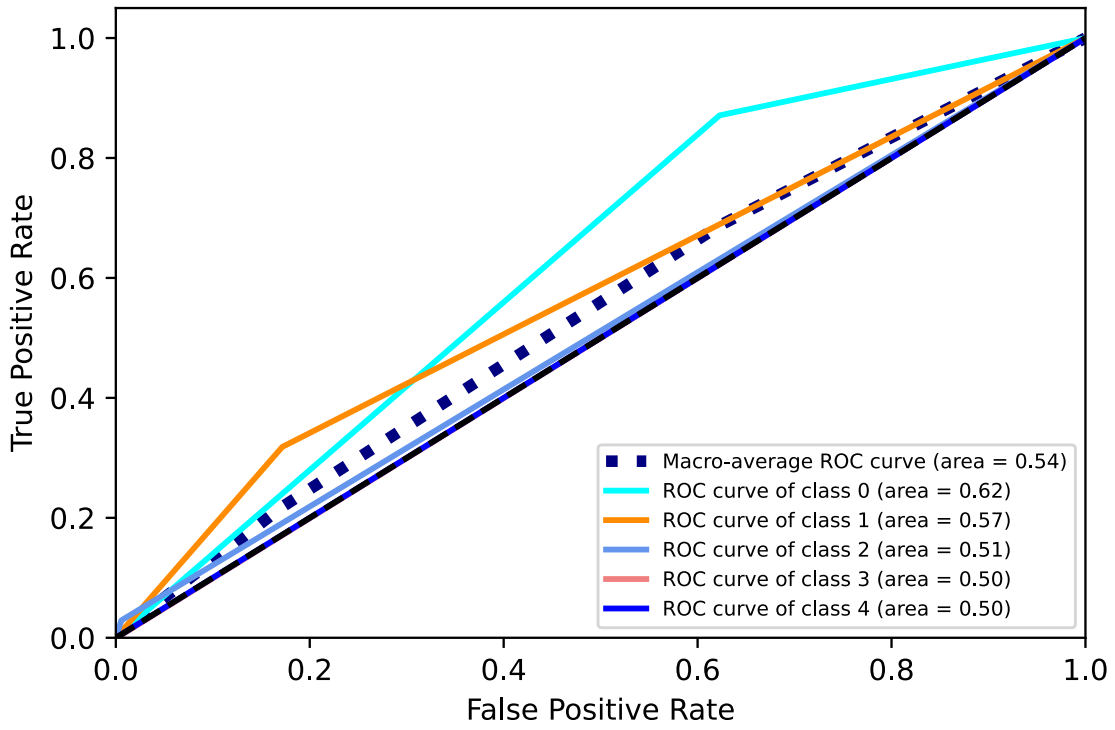

Multiclass accuracy in right apical lobe

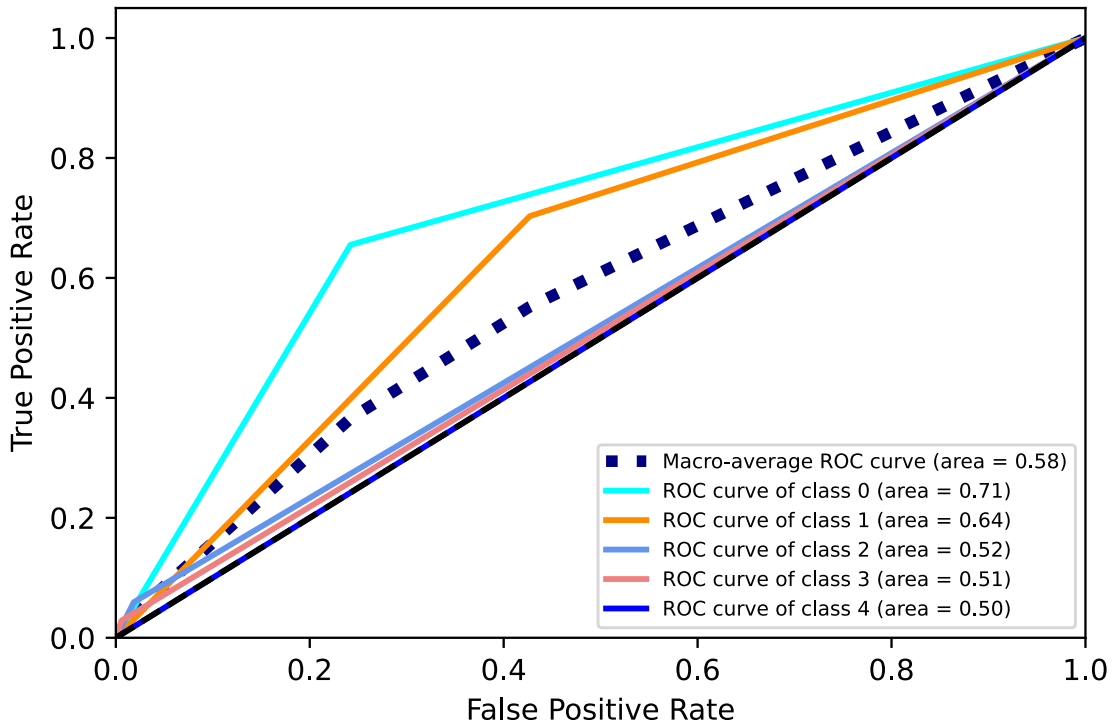

Supplement: MOESM1 [file 13567_2024_1432_MOESM1_ESM.pdf]
