# Supplementary material for: Scoring of swine lung images: a comparison between a computer vision system and human evaluators
Source: Springer Nature journal article supplement (doi:10.1186/s13567-024-01432-5), 2025-01-13

Binary classification accuracy in left cardiac lobe

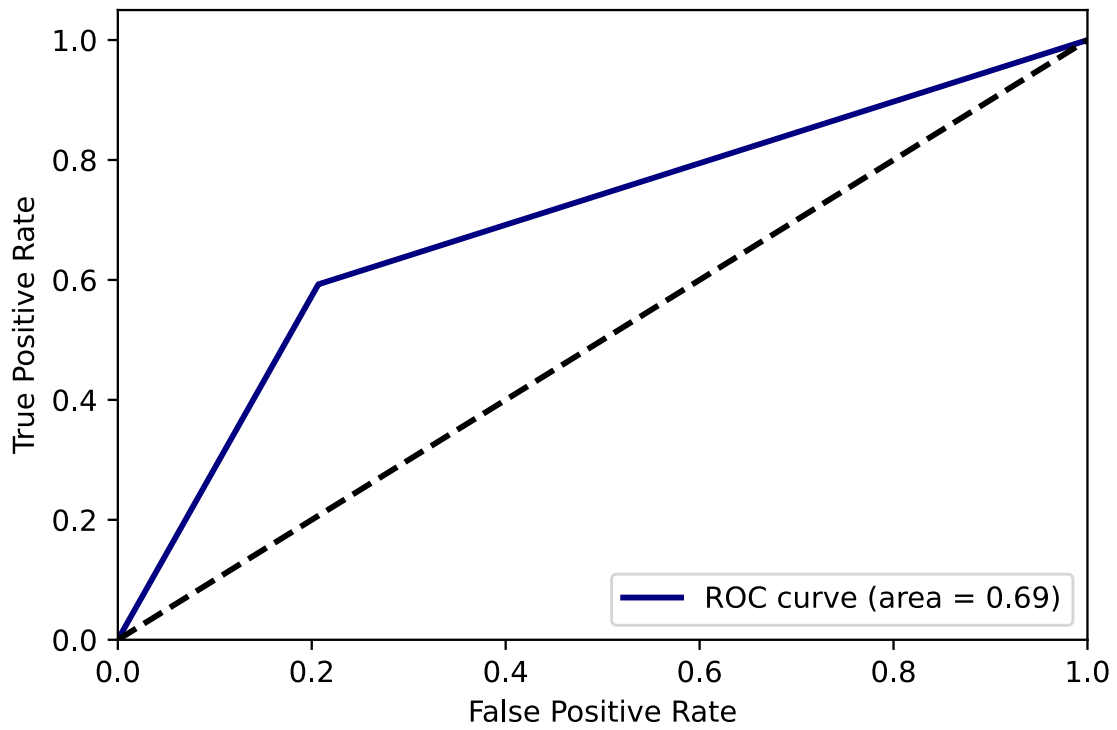

Binary classification accuracy in right cardiac lobe

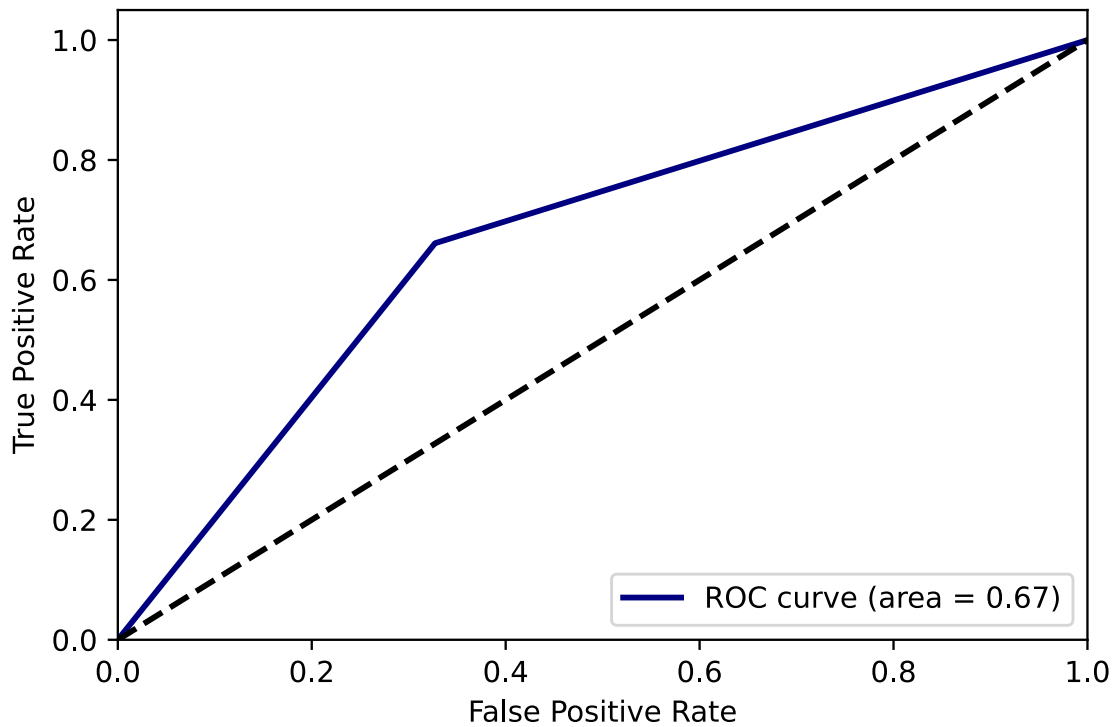

Supplement: MOESM5 [file 13567_2024_1432_MOESM5_ESM.pdf]
